# Supplementary material
Source: PubMed Central journal article supplement (PMC4216218)
Supplement: jm500311e_si_001.pdf [file jm500311e_si_001.pdf]

**Designing Allosteric Inhibitors of Factor XIa.**  
**Lessons from the Interactions of Sulfated Pentagalloylglucopyranosides**

Rami A. Al-Horani and Umesh R. Desai\*

Address correspondence to: Umesh R. Desai, Department of Medicinal Chemistry, Virginia Commonwealth University, 800 E. Leigh Street, Suite 212, Richmond, VA 23219. Ph. 804-828-7328, Fax 804-827-3664, e-mail:

[urdesai@vcu.edu](mailto:urdesai@vcu.edu)

**SUPPLEMENTARY MATERIAL**

| <b>Table of Contents</b>                                                                                                                                                                                                                                     | <b>Page</b> |
|--------------------------------------------------------------------------------------------------------------------------------------------------------------------------------------------------------------------------------------------------------------|-------------|
| Synthesis and characterization of different sulfated pentagalloyl- $\beta$ -D-glucopyranoside variants.                                                                                                                                                      | S2          |
| Synthesis and characterization of the decasulfated species <b>5</b> .                                                                                                                                                                                        | S3          |
| Table S1. UPLC-ESI-MS characterization of SPGG variants components and their corresponding average molecular weight.                                                                                                                                         | S5          |
| Table S2. Hydrolysis of the chromogenic substrate S-2366 by human factor XIa in the presence of $\beta$ -SPGG-8.                                                                                                                                             | S6          |
| Table S3. Inhibition of factor XIa by $\beta$ -SPGG-8, $\beta$ -SPGG-2, $\beta$ -SPGG-1, and $\beta$ -SPGG-0.5 in presence of increasing concentrations of UFH (0–500 $\mu$ M).                                                                              | S7          |
| Table S4. Salt dependence studies of FXIa–DEGR interactions with $\beta$ -SPGG-2, UFH, and H8.                                                                                                                                                               | S8          |
| Figure S1. Representative UPLC profiles for $\beta$ -SPGG-0.5 (A) and $\beta$ -SPGG-1 (B). See experimental part for further details.                                                                                                                        | S9          |
| Figure S2. Representative UPLC profiles for $\beta$ -SPGG-4 (A), $\beta$ -SPGG-6 (B), $\alpha$ -SPGG-8 (C), and $\alpha,\beta$ -SPGG-8 (D). See experimental part for further details.                                                                       | S10         |
| Figure S3. Changes in the fluorescence emission spectra of dansylated FXIa (FXIa–DEGR) ( $\lambda_{EX}$ = 345 nm) induced by the binding of $\beta$ -SPGG-2 (A), UFH (B), H8 (C), and $\beta$ -SPGG-8 (D).                                                   | S11         |
| Figure S4. Changes in the fluorescence emission spectrum of dansylated factor XIa (FXIa–DEGR) ( $\lambda_{EX}$ = 345 nm) induced by the binding of $\beta$ -SPGG-2 at different salt concentrations of 150 (A), 100 (B), 50 (C), and 25 mM (D).              | S12         |
| Figure S5. Spectrofluorimetric measurement of the FXIa–DEGR affinity of $\beta$ -SPGG-2 (A) and UFH (B) at pH 7.4 and 37 °C and different salt concentrations of 150 ( $\blacktriangle$ ), 100 ( $\circ$ ), 50 ( $\blacksquare$ ), and 25 mM ( $\diamond$ ). | S13         |

## **Synthesis and characterization of different sulfated pentagalloyl $\beta$ -D-glucopyranoside variants.**

**Synthesis and characterization of sulfated pentagalloyl  $\beta$ -D-glucopyranoside ( $\beta$ -SPGG-2).**<sup>1,2</sup> The polyphenolic precursor, pentagalloyl- $\beta$ -D-glucopyranoside (PGG, **3a**), was obtained in two steps, esterification and catalytic hydrogenation as reported earlier.<sup>2</sup> Sulfated pentagalloyl  $\beta$ -D-glucopyranoside ( $\beta$ -SPGG-2, **4c**) (Scheme 1) was synthesized as reported earlier<sup>2</sup> by microwave-assisted synthesis followed by size exclusion and sodium exchange chromatographies. This inhibitor was characterized by <sup>1</sup>H NMR, <sup>13</sup>C NMR and found to be consistent with previous report.<sup>15</sup> UPLC-MS was further used to structurally characterize SPGG components and estimate its average molecular weight in a manner similar to previous study.<sup>2</sup> Exact similar experimental conditions were applied to synthesize other SPGG derivatives except for the sulfation time (0.5, 1, 2, 4, 6, or 8 hrs) and the glucose unit which could be  $\alpha$ -unit or  $\alpha,\beta$ -unit instead of  $\beta$ -unit. The configuration of the anomeric carbon in each variant was determined by measuring the  $[\alpha]_D^{20}$  in acetone (c=1%) of the corresponding polyphenolic precursor. Consistent with literature, the specific rotations of the precursors were found to be +25.2° for  $\beta$ -, +65.5° for  $\alpha$ -, and +57.9° for  $\alpha,\beta$ -derivative.<sup>1</sup>

**General procedure for esterification of polyalcohol ( $\beta$ -D-glucopyranose).** To a stirring solution of 3,4,5-tribenzyloxybenzoic acid (5 mmol) and DMAP (5 mmol) in anhydrous CH<sub>2</sub>Cl<sub>2</sub> (20 mL), DCC (5 mmol) was added and the resulting mixture was stirred for 30 min at RT. The saccharide ( $\beta$ -D-glucopyranose (**1a**)) (1 mmol) was then added and the resulting reaction mixture was refluxed 24 hrs. After that, the reaction was cooled to RT and filtered through a pad of Celite. The organic phase was then washed with HCl (1 M, 15 mL), brine solution (15 mL), and H<sub>2</sub>O (15 mL). The organic phase was dried over anhydrous Na<sub>2</sub>SO<sub>4</sub>, concentrated *in vacuo*, and purified by flash chromatography using hexanes/EtOAc mobile phase as described above. 20 mL fractions containing the desired product (protected PGG (**2a**)) were pooled together and concentrated *in vacuo* to afford the desired product as a white solid in yields of (85–90 %).

**1, 2, 3, 4, 6-Penta-O-(3, 4, 5-tri-O-benzylgalloyl)- $\beta$ -D-glucopyranose (Protected PGG, **2a**).** <sup>1</sup>H NMR (CDCl<sub>3</sub>, 400 MHz): 7.38–7.08 (m, 85 H), 6.15 (d, 1 H, *J* = 8.12 Hz), 5.98 (t, 1 H, *J* = 9.68 Hz), 5.78–5.74 (dd, 1 H, *J*<sub>1</sub> = 9.80 Hz, *J*<sub>2</sub> = 8.20 Hz), 5.66 (t, 1 H, *J* = 9.64 Hz), 5.08–4.77 (m, 30 H), 4.71–4.68 (dd, 1 H, *J*<sub>1</sub> = 11.68 Hz, *J*<sub>2</sub> = 2.32 Hz), 4.39–4.35 (m, 1 H), 4.35–4.28 (dd, 1 H, *J*<sub>1</sub> = 11.8 Hz, *J*<sub>2</sub> = 5.88 Hz). <sup>13</sup>C NMR (CDCl<sub>3</sub>, 100 MHz): 165.67, 165.61, 165.07, 165.01, 164.22, 152.67, 152.62, 152.54, 143.36, 143.30, 143.23, 142.74, 137.56, 137.38, 136.78, 136.51, 136.46, 136.37, 128.57, 128.55, 128.53, 128.48, 128.46, 128.41, 128.39, 128.31, 128.24, 128.17, 128.13, 128.05, 127.65, 127.60, 127.58, 124.62, 123.75, 123.64, 123.40, 109.56, 109.51, 109.43, 109.31, 109.27, 106.51, 93.08, 75.14, 73.36, 73.30, 71.47, 71.34, 71.26, 71.16, 71.11, 69.88, 63.23. MS (ESI) calculated for C<sub>146</sub>H<sub>122</sub>O<sub>26</sub>, [M + H]<sup>+</sup>, *m/z* 2293.53, found for [M + H – C<sub>28</sub>H<sub>23</sub>O<sub>5</sub>]<sup>+</sup>, *m/z* 1852.975.

**General procedure for catalytic hydrogenation (O-Debenzylation).** A solution of benzylated benzoyl derivative of glucopyranose (protected PGG (**2a**)) in CH<sub>3</sub>OH/THF solvent mixture (15 mL) was hydrogenated over 20% of 10% Pd(OH)<sub>2</sub>/C with H<sub>2</sub> (gas) (50 psi) at RT for 10 hrs. The Pd(OH)<sub>2</sub>/C catalyst was then removed by filtration over Celite and the resulting filtrate was dried over anhydrous Na<sub>2</sub>SO<sub>4</sub> and concentrated *in vacuo*. A flash chromatography using hexanes/EtOAc mixture as a mobile phase was utilized to purify the reaction crude to afford the corresponding polyphenolic intermediate (PGG (**3a**)) as a yellow–white solid in yields of (>92%).

**1, 2, 3, 4, 6-O-Pentagalloyl- $\beta$ -D-glucopyranose (PGG, **3a**).** <sup>1</sup>H NMR (acetone-*d*<sub>6</sub>, 400 MHz): 8.32–7.98 (m, br, 15 H, phenolic–OH), 7.18 (s, 2 H), 7.12 (s, 2 H), 7.06 (s, 2 H), 7.02 (s, 2 H), 6.97 (s, 2 H), 6.33 (d, 1 H, *J* = 8.32 Hz), 6.01 (t, 1 H, *J* = 9.68 Hz), 5.68–5.59 (m, 2 H), 4.56–4.52 (m, 2 H), 4.43–4.39 (dd, 1 H, *J*<sub>1</sub> = 12.68 Hz, *J*<sub>2</sub> = 4.68 Hz). <sup>13</sup>C NMR (acetone-*d*<sub>6</sub>, 100 MHz): 166.40, 165.92, 165.70, 165.65, 164.98, 146.18, 146.06, 146.02, 145.98, 145.90, 139.81, 139.32, 139.04,

121.52, 120.75, 120.65, 120.04, 110.46, 110.36, 110.25, 110.20, 93.39, 74.03, 73.37, 71.82, 69.38, 62.86. MS (ESI) calculated for C<sub>41</sub>H<sub>32</sub>O<sub>26</sub>, [M + H]<sup>+</sup>, m/z 941.69, found for [M + Na]<sup>+</sup>, m/z 963.157.

**General procedure for microwave-assisted sulfation.** To a stirring solution of polyphenolic intermediate (PGG (**3a**)) (1 mmol) in anhydrous CH<sub>3</sub>CN (2 mL), the sulfating reagent, N(CH<sub>3</sub>)<sub>3</sub>-SO<sub>3</sub> complex (5 mmol/OH), was added. The resulting mixture was then microwaved at 90 °C for 2 hrs. The resulting crude product was cooled to RT and concentrated *in vacuo* at temperature less than 35 °C. All resulting polysulfated molecules were purified as described above using the size exclusion chromatography (G10). The sodium salt form of the isolated white fluffy powder of sulfated species ( $\beta$ -SPGG-2 (**4c**)) was generated in yields of (66–70%) by the sodium exchange chromatography followed by lyophilization as described above.

**Sulfated Pentagalloyl  $\beta$ -D-glucopyranoside ( $\beta$ -SPGG-2, **4c**).** <sup>1</sup>H NMR (D<sub>2</sub>O, 400 MHz): 8.11–7.40 (m, 10 H), 6.51–6.47 (m, 1 H), 6.11–6.18 (m, 1 H), 5.79–5.97 (m, 2 H), 4.85–4.60 (m, 3 H). <sup>13</sup>C NMR (D<sub>2</sub>O, 100 MHz): 166.4, 165.7, 165.4, 164.7, 150.6, 150.5, 147.8, 147.4, 147.2, 145.7, 145.5, 122.4, 122.2, 122.2, 122.0, 121.0, 119.7, 119.0, 118.7, 115.3, 93.0, 74.5, 72.2, 71.6, 68.9, 63.5.

Similar chemical reactions were exploited to synthesize other SPGG derivatives. Following are the characterization data.

**Sulfated Pentagalloyl  $\beta$ -D-glucopyranoside ( $\beta$ -SPGG-0.5, **4a**).** <sup>1</sup>H NMR (D<sub>2</sub>O, 400 MHz): 7.91–7.73 (m, 4 H), 7.59–7.21 (m, 4 H), 7.12–6.70 (m, 2H), 6.45–6.40 (m, 1 H), 6.07–5.90 (m, 1 H), 5.89–5.76 (m, 2 H), 4.70–4.64 (m, 3 H). <sup>13</sup>C NMR (D<sub>2</sub>O, 100 MHz): 166.3, 165.9, 165.7, 165.4, 150.3, 150.2, 147.8, 147.4, 145.3, 144.6, 143.1, 122.4, 122.1, 119.7, 119.2, 118.8, 117.2, 116.8, 115.5, 110.3, 93.0, 73.5, 71.8, 70.6, 68.5, 63.0.

**Sulfated Pentagalloyl  $\beta$ -D-glucopyranoside ( $\beta$ -SPGG-1, **4b**).** <sup>1</sup>H NMR (D<sub>2</sub>O, 400 MHz): 8.11–7.77 (m, 3 H), 7.59–7.19 (m, 5 H), 7.15–6.89 (m, 2 H), 6.45–6.40 (m, 1 H), 6.22–5.90 (m, 1 H), 5.86–5.59 (m, 2 H), 4.70–4.60 (m, 3 H). <sup>13</sup>C NMR (D<sub>2</sub>O, 100 MHz): 166.2, 165.6, 165.3, 164.6, 150.6, 150.5, 147.4, 145.3, 144.6, 143.2, 122.3, 122.0, 119.1, 118.8, 117.2, 116.8, 115.0, 110.2, 93.0, 73.5, 72.0, 71.0, 69.0, 63.20.

**Sulfated Pentagalloyl  $\beta$ -D-glucopyranoside ( $\beta$ -SPGG-8, **4f**).** <sup>1</sup>H NMR (D<sub>2</sub>O, 400 MHz): 8.18–7.45 (m, 10 H), 6.56–6.54 (m, 1 H), 6.21–6.10 (m, 1 H), 6.00–5.86 (m, 2 H), 4.84–4.75 (m, 3 H). <sup>13</sup>C NMR (D<sub>2</sub>O, 100 MHz): 166.3, 165.6, 165.4, 164.7, 150.6, 150.5, 147.9, 147.5, 147.2, 145.8, 145.5, 122.4, 122.1, 122.0, 119.0, 118.8, 115.2, 93.0, 74.6, 72.3, 71.5, 68.7, 63.5.

**Synthesis and characterization data of the decasulfated species (**5**, in Scheme 1) of SPGG variants.**

**Chemical Synthesis.** Molecule **5** was performed in similar fashion to SPGG synthesis except 3,4,5-tribenzyloxy benzoic acid was replaced by 3,5-dibenzyloxy benzoic acid.

**1, 2, 3, 4, 6-Penta-O-(3, 5-di-O-benzyloxybenzoyl)- $\alpha,\beta$ -D-glucopyranose (**2d**).** <sup>1</sup>H NMR (CDCl<sub>3</sub>, 400 MHz): 7.34–7.09 (m, 60 H), 6.78 (d, 1 H, *J* = 3.6 Hz), 6.70–6.69 (m, 1 H), 6.66–6.64 (m, 2 H), 6.63–6.62 (m, 2 H), 6.20 (t, 1 H, *J* = 9.92 Hz), 5.69 (t, 1 H, *J* = 10.12 Hz), 5.59–5.56 (dd, 1 H, *J*<sub>1</sub> = 10.16 Hz, *J*<sub>2</sub> = 3.76 Hz), 4.95–4.71 (m, 20 H), 4.63–4.59 (m, 1 H), 4.55–4.52 (m, 1 H), 4.37–4.33 (dd, 1 H, *J*<sub>1</sub> = 12.36 Hz, *J*<sub>2</sub> = 4.76 Hz). <sup>13</sup>C NMR (CDCl<sub>3</sub>, 100 MHz): 165.72, 165.66, 165.11, 164.95, 164.23, 159.98, 159.88, 159.85, 159.80, 136.58, 136.30, 131.47, 130.89, 130.69, 130.54, 128.63, 128.59, 128.54, 128.14, 128.06, 127.64, 127.59, 127.55, 108.76, 108.71, 108.55, 108.39, 108.19, 107.96, 90.33, 70.91, 70.74, 70.56, 70.34, 70.30, 70.25, 70.17, 69.43, 62.86. MS (ESI) calculated for C<sub>111</sub>H<sub>92</sub>O<sub>21</sub>, [M + H]<sup>+</sup>, m/z 1761.91, found for [M + Na]<sup>+</sup>, m/z 1784.975.

**1, 2, 3, 4, 6-Penta-O-(3, 5-dihydroxybenzoyl)- $\alpha,\beta$ -D-glucopyranose (3d).**  $^1\text{H}$  NMR (acetone- $d_6$ , 400 MHz): 8.5 (s, br, 20 H, phenolic-OH), 7.03 (d, 1 H,  $J = 2.08$  Hz), 6.95 (d, 1 H,  $J = 2.08$  Hz), 6.94 (d, 1 H,  $J = 2.16$  Hz), 6.87 (d, 1 H,  $J = 2.08$  Hz), 6.82 (d, 1 H,  $J = 2.12$  Hz), 6.81 (d, 1 H,  $J = 2.16$  Hz), 6.76–6.75 (m, 3 H), 6.73 (d, 1 H,  $J = 2.12$  Hz), 6.69–6.29 (d & t & t & d, 2 H,  $J = 3.52$  Hz &  $J = 1.88$  Hz &  $J = 2.08$  Hz &  $J = 8.28$  Hz), 6.47–6.44 (m, 1 H), 6.42 (s, 1 H), 6.37 (s, 1 H), 6.35 (d, 1 H,  $J = 1.8$  Hz), 6.10 & 5.97 (t & t, 1 H,  $J = 10.04$  Hz &  $J = 9.68$  Hz), 5.75 (t & m & dd, 2 H,  $J = 10.04$  Hz &  $J_1 = 10.28$  Hz,  $J_2 = 3.64$  Hz), 4.66–4.51 (m, 1 H), 4.47–4.37 (m, 2 H).  $^{13}\text{C}$  NMR (acetone- $d_6$ , 100 MHz): 166.50, 166.30, 166.10, 166.03, 165.81, 165.75, 165.06, 159.75, 159.64, 159.49, 159.46, 159.42, 159.39, 132.75, 132.72, 131.97, 131.94, 131.91, 131.86, 131.55, 131.34, 125.42, 109.16, 109.16, 109.08, 109.0, 108.91, 108.86, 108.75, 108.66, 108.41, 93.51, 90.69, 73.89, 73.7, 72.07, 71.59, 71.57, 71.24, 69.62, 69.25, 63.06, 62.86. MS (ESI) calculated for  $\text{C}_{41}\text{H}_{32}\text{O}_{21}$ ,  $[\text{M} + \text{H}]^+$ ,  $m/z$  861.69, found for  $[\text{M} + \text{Na}]^+$ ,  $m/z$  883.225.

**Sodium 1, 2, 3, 4, 6-Penta-O-(3, 5-di-O-sulfonato-benzoyl)- $\alpha,\beta$ -D-glucopyranose (5).**  $^1\text{H}$  NMR ( $\text{D}_2\text{O}$ , 400 MHz): 7.38 (d, 2 H,  $J = 1.92$  Hz), 7.36 (d, 2 H,  $J = 1.96$  Hz), 7.32–7.27 (m, 9 H), 7.24 (d, 2 H,  $J = 1.76$  Hz), 6.45 (d, 1 H,  $J = 7.88$  Hz), 6.10 (t, 1 H,  $J = 9.28$  Hz), 5.72 (t, 1 H,  $J = 8.52$  Hz), 5.55 (t, 1 H,  $J = 8.88$  Hz), 4.68 (s, br, 1 H), 4.32 (s, br, 2 H).  $^{13}\text{C}$  NMR ( $\text{D}_2\text{O}$ , 100 MHz): 166.19, 165.45, 165.14, 165.01, 164.43, 152.29, 152.0, 131.35, 130.48, 130.32, 120.98, 120.61, 120.54, 120.42, 120.21, 120.11, 93.20, 73.84, 72.48, 71.97, 71.72, 70.09, 63.67. MS (ESI) calculated for  $\text{C}_{41}\text{H}_{22}\text{Na}_{11}\text{O}_{51}\text{S}_{10}$  (sodium sulfates),  $[\text{M} + \text{Na}]^{+1}$ ,  $m/z$  1904.12 and calculated for  $\text{C}_{113}\text{H}_{214}\text{N}_{12}\text{O}_{51}\text{S}_{10}$  (*n*-hexylammonium sulfates),  $[\text{M} + (\text{CH}_3(\text{CH}_2)_5\text{NH}_3)_{12}]^{+2}$ ,  $m/z$  1438.815, found for  $[\text{M} + (\text{CH}_3(\text{CH}_2)_5\text{NH}_3)_{12}]^{+2}$ ,  $m/z$  1438.707.

## References

1. Khanbabaee, K.; Lötzerich, K. Efficient total synthesis of the natural products 2,3,4,6-tetra-*O*-galloyl-D-glucopyranose, 1,2,3,4,6-Penta-*O*-galloyl- $\beta$ -D-glucopyranose and the unnatural 1,2,3,4,6-Penta-*O*-galloyl- $\alpha$ -D-glucopyranose. *Tetrahedron* **1997**, *53*, 10725–10732.
2. Al-Horani, R. A.; Ponnusamy, P.; Mehta, A. Y.; Gailani, D.; Desai, U. R. Sulfated pentagalloyl-glucoside is a potent, allosteric, and selective inhibitor of factor XIa. *J. Med. Chem.* **2013**, *56*, 867–878.

**Table S1.** UPLC-ESI-MS characterization of SPGG variants components and their corresponding average molecular weight.<sup>a</sup>

| Molecule                      | Mr   | P1                                        | P2                                        | P3                                        | P4                                         | P5                                         | P6                                         | P7                                         |
|-------------------------------|------|-------------------------------------------|-------------------------------------------|-------------------------------------------|--------------------------------------------|--------------------------------------------|--------------------------------------------|--------------------------------------------|
|                               |      | m/z (proportions)                         |                                           |                                           |                                            |                                            |                                            |                                            |
|                               |      | 1207<br>(7 SO <sub>3</sub> <sup>-</sup> ) | 1298<br>(8 SO <sub>3</sub> <sup>-</sup> ) | 1388<br>(9 SO <sub>3</sub> <sup>-</sup> ) | 1479<br>(10 SO <sub>3</sub> <sup>-</sup> ) | 1570<br>(11 SO <sub>3</sub> <sup>-</sup> ) | 1660<br>(12 SO <sub>3</sub> <sup>-</sup> ) | 1750<br>(13 SO <sub>3</sub> <sup>-</sup> ) |
| <b><i>β</i>-SPGG-0.5 (4a)</b> | 1923 | 3%                                        | 11%                                       | 28%                                       | 43%                                        | 15%                                        | 0%                                         | 0%                                         |
| <b><i>β</i>-SPGG-1 (4b)</b>   | 1940 | 4%                                        | 11%                                       | 23%                                       | 31%                                        | 23%                                        | 8%                                         | 0%                                         |
| <b><i>β</i>-SPGG-2 (4c)</b>   | 1962 | 5%                                        | 10%                                       | 19%                                       | 42%                                        | 17%                                        | 7%                                         | 0%                                         |
| <b><i>β</i>-SPGG-4 (4d)</b>   | 1975 | 5%                                        | 10%                                       | 20%                                       | 31%                                        | 15%                                        | 11%                                        | 6%                                         |
| <b><i>β</i>-SPGG-6 (4e)</b>   | 1960 | 8%                                        | 13%                                       | 20%                                       | 27%                                        | 18%                                        | 19%                                        | 6%                                         |
| <b><i>β</i>-SPGG-8 (4f)</b>   | 1982 | 3%                                        | 8%                                        | 18%                                       | 34%                                        | 24%                                        | 8%                                         | 5%                                         |
| <b><i>α</i>-SPGG-8 (4g)</b>   | 2071 | 3%                                        | 6%                                        | 11%                                       | 18%                                        | 15%                                        | 28%                                        | 18%                                        |
| <b><i>α,β</i>-SPGG-8 (4h)</b> | 2090 | 2%                                        | 4%                                        | 7%                                        | 17%                                        | 19%                                        | 35%                                        | 16%                                        |

<sup>a</sup> UPLC resolution of SPGG variants into seven peaks (p1–p7), which arise from variable sulfation of the PGG scaffold. The detailed compositional profile of these variants was determined using reversed-phase UPLC-ESI-MS analysis, as performed in our earlier work.<sup>2</sup> The profiles indicated the presence of doubly charged molecular ion peaks at 1207, 1297, 1388, 1478, 1569, 1661 and 1750 m/z, which corresponded to hepta-, octa-, nona-, deca-, undeca-, dodeca-, and trideca-sulfated species, respectively. Each of these peaks was a composite of multiple peaks, which implies the presence of several regio-isomers of identical sulfation level.

**Table S2.** Hydrolysis of the Chromogenic Substrate S-2366 by Human Factor XIa in the Presence of  $\beta$ -SPGG-8.<sup>a</sup>

| <i>Inhibitor</i>                      | <i>Conc. (<math>\mu\text{g/mL}</math>)</i> | <i>K<sub>M</sub> (mM)</i>    | <i>V<sub>MAX</sub> (mAU/min)</i> |
|---------------------------------------|--------------------------------------------|------------------------------|----------------------------------|
| <i><math>\beta</math>-SPGG-8 (4f)</i> | 0                                          | 0.24 $\pm$ 0.03 <sup>b</sup> | 76 $\pm$ 2                       |
|                                       | 0.05                                       | 0.25 $\pm$ 0.03              | 72 $\pm$ 2                       |
|                                       | 0.5                                        | 0.23 $\pm$ 0.02              | 69 $\pm$ 2                       |
|                                       | 5                                          | 0.25 $\pm$ 0.05              | 59 $\pm$ 3                       |
|                                       | 15                                         | 0.36 $\pm$ 0.10              | 40 $\pm$ 2                       |
|                                       | 30                                         | 0.33 $\pm$ 0.10              | 20 $\pm$ 2                       |

<sup>a</sup> *K<sub>M</sub>* and *V<sub>MAX</sub>* values of S-2366 substrate hydrolysis by human factor XIa were measured as described under Experimental Procedures. mAU indicates milliabsorbance units.

<sup>b</sup> Error represents  $\pm 1$  S.E.

**Table S3.** Inhibition of Factor XIa by  $\beta$ -SPGG-8,  $\beta$ -SPGG-2,  $\beta$ -SPGG-1, and  $\beta$ -SPGG-0.5 in Presence of Increasing Concentrations of UFH (0–500  $\mu$ M).<sup>a</sup>

| <i>SPGG variant</i>                            | <i>UFH (<math>\mu</math>M)</i> | <i>FXIa IC<sub>50</sub></i><br><i>(<math>\mu</math>g/mL)</i> | <i>HS</i>     | <i><math>\Delta Y</math></i> |
|------------------------------------------------|--------------------------------|--------------------------------------------------------------|---------------|------------------------------|
| <b><i><math>\beta</math>-SPGG-8 (4f)</i></b>   | <b>0</b>                       | 0.16 $\pm$ 0.01 <sup>b</sup>                                 | 1.9 $\pm$ 0.3 | 95 $\pm$ 3                   |
|                                                | <b>5</b>                       | 0.22 $\pm$ 0.01                                              | 2.1 $\pm$ 0.2 | 98 $\pm$ 3                   |
|                                                | <b>50</b>                      | 0.34 $\pm$ 0.01                                              | 2.5 $\pm$ 0.2 | 96 $\pm$ 2                   |
|                                                | <b>250</b>                     | 0.60 $\pm$ 0.01                                              | 2.1 $\pm$ 0.2 | 100 $\pm$ 2                  |
|                                                | <b>500</b>                     | 1.17 $\pm$ 0.04                                              | 2.4 $\pm$ 0.4 | 103 $\pm$ 3                  |
| <b><i><math>\beta</math>-SPGG-2 (4c)</i></b>   | <b>0</b>                       | 0.96 $\pm$ 0.03                                              | 1.6 $\pm$ 0.2 | 98 $\pm$ 3                   |
|                                                | <b>5</b>                       | 1.11 $\pm$ 0.04                                              | 1.7 $\pm$ 0.2 | 97 $\pm$ 3                   |
|                                                | <b>30</b>                      | 3.7 $\pm$ 0.1                                                | 1.7 $\pm$ 0.2 | 95 $\pm$ 3                   |
|                                                | <b>100</b>                     | 11.6 $\pm$ 2.8                                               | 1.3 $\pm$ 0.4 | 100 $\pm$ 6                  |
|                                                | <b>180</b>                     | 34.1 $\pm$ 5.0                                               | 2.3 $\pm$ 0.5 | 93 $\pm$ 3                   |
|                                                | <b>300</b>                     | 86.2 $\pm$ 1.8                                               | 6.7 $\pm$ 1.4 | 90 $\pm$ 4                   |
| <b><i><math>\beta</math>-SPGG-1 (4b)</i></b>   | <b>0</b>                       | 1.01 $\pm$ 0.05                                              | 1.4 $\pm$ 0.2 | 93 $\pm$ 4                   |
|                                                | <b>5</b>                       | 1.97 $\pm$ 0.09                                              | 3.4 $\pm$ 0.5 | 100 $\pm$ 4                  |
|                                                | <b>30</b>                      | 4.39 $\pm$ 0.23                                              | 2.1 $\pm$ 0.5 | 93 $\pm$ 5                   |
|                                                | <b>100</b>                     | 10.24 $\pm$ 0.33                                             | 2.0 $\pm$ 0.2 | 96 $\pm$ 3                   |
| <b><i><math>\beta</math>-SPGG-0.5 (4a)</i></b> | <b>0</b>                       | 1.77 $\pm$ 0.05                                              | 2.5 $\pm$ 0.3 | 94 $\pm$ 3                   |
|                                                | <b>5</b>                       | 3.27 $\pm$ 0.05                                              | 3.4 $\pm$ 0.5 | 92 $\pm$ 3                   |
|                                                | <b>30</b>                      | 8.95 $\pm$ 0.26                                              | 4.6 $\pm$ 1.5 | 87 $\pm$ 4                   |
|                                                | <b>100</b>                     | 19.8 $\pm$ 0.84                                              | 3.1 $\pm$ 0.7 | 96 $\pm$ 5                   |

<sup>a</sup> The FXIa residual activity % values were obtained following analysis of direct inhibition of human factor XIa in appropriate TrisHCl buffers of pH 7.4 at 37 °C in presence of increasing concentrations of UFH. Inhibition was monitored by spectrophotometric measurement of residual enzyme activity. See details under Experimental Procedures.

<sup>b</sup> Errors represent  $\pm 1$  S.E.

**Table S4.** Salt Dependence Studies of FXIa–DEGR Interactions with  $\beta$ -SPGG-2, UFH, and H8.<sup>a</sup>

| <i>Molecules</i>                        | <i>[NaCl] (mM)</i> | <i>K<sub>D</sub> (<math>\mu</math>M)</i> | <i><math>\Delta F_{MAX}</math> (%)</i> |
|-----------------------------------------|--------------------|------------------------------------------|----------------------------------------|
| <b><i><math>\beta</math>-SPGG-2</i></b> | 150                | 0.44 $\pm$ 0.10 <sup>b</sup>             | -16 $\pm$ 1                            |
|                                         | 100                | 0.31 $\pm$ 0.05                          | -17 $\pm$ 1                            |
|                                         | 50                 | 0.25 $\pm$ 0.03                          | -16 $\pm$ 1                            |
|                                         | 25                 | 0.11 $\pm$ 0.02                          | -17 $\pm$ 1                            |
| <b><i>UFH</i></b>                       | 150                | 1.6 $\pm$ 0.5                            | -29 $\pm$ 2                            |
|                                         | 100                | 1.2 $\pm$ 0.2                            | -34 $\pm$ 3                            |
|                                         | 50                 | 0.6 $\pm$ 0.2                            | -30 $\pm$ 2                            |
|                                         | 25                 | 0.38 $\pm$ 0.10                          | -43 $\pm$ 3                            |
| <b><i>H8</i></b>                        | 150                | 3.8 $\pm$ 0.7                            | -49 $\pm$ 6                            |
|                                         | 100                | 3 $\pm$ 0.7                              | -47 $\pm$ 7                            |
|                                         | 50                 | 2 $\pm$ 0.1                              | -46 $\pm$ 1                            |
|                                         | 25                 | 1.5 $\pm$ 0.1                            | -40 $\pm$ 2                            |

<sup>a</sup> Affinity was measured using the decrease in dansyl group fluorescence ( $\lambda_{EX}$  = 345 nm and  $\lambda_{EM}$  ~547nm) as a function of ligand concentration in 50 mM TrisHCl buffer, pH 7.4, containing 150, 100, 50, or 25 mM NaCl, and 0.1% PEG8000 at 37 °C. See Experimental Section for additional details.

<sup>b</sup> Error represents  $\pm 1$  SE.



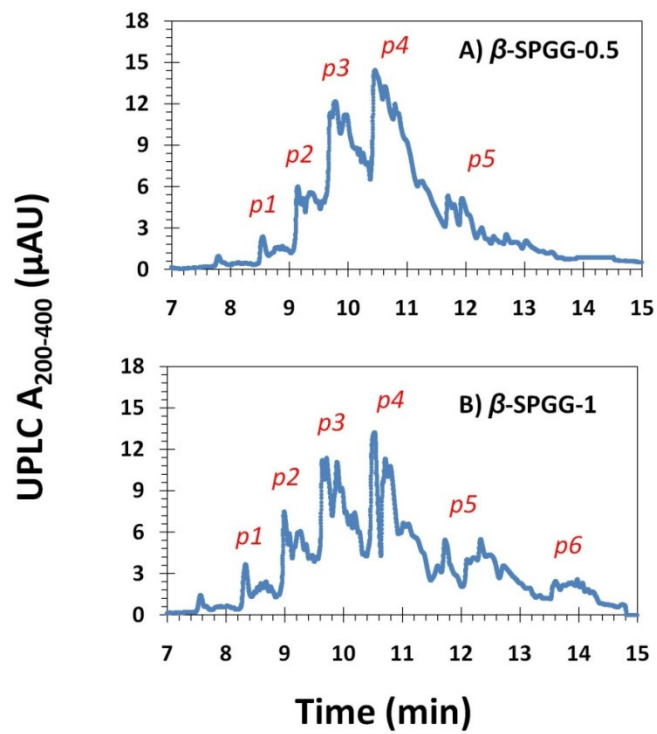

**Figure S1.** Representative UPLC profiles for  $\beta$ -SPGG-0.5 (A) and  $\beta$ -SPGG-1 (B). See Experimental part for further details.

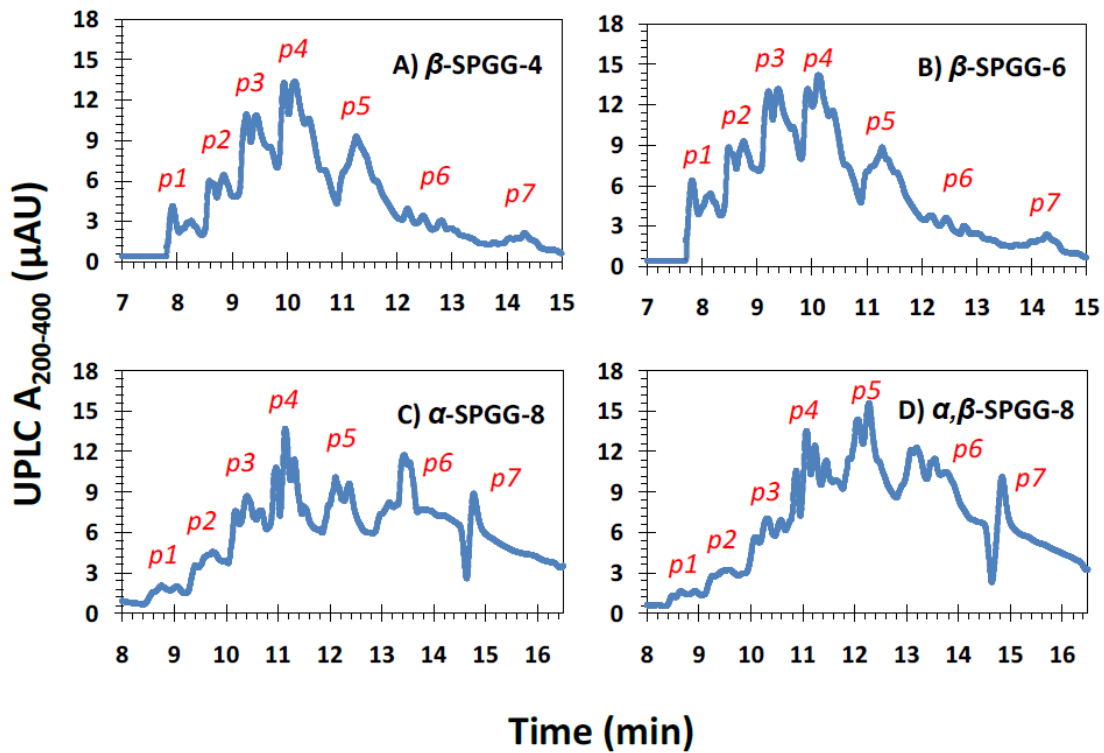

**Figure S2.** Representative UPLC profiles for  $\beta$ -SPGG-4 (A),  $\beta$ -SPGG-6 (B),  $\alpha$ -SPGG-8 (C),  $\alpha,\beta$ -SPGG-8 (D). See Experimental part for further details.

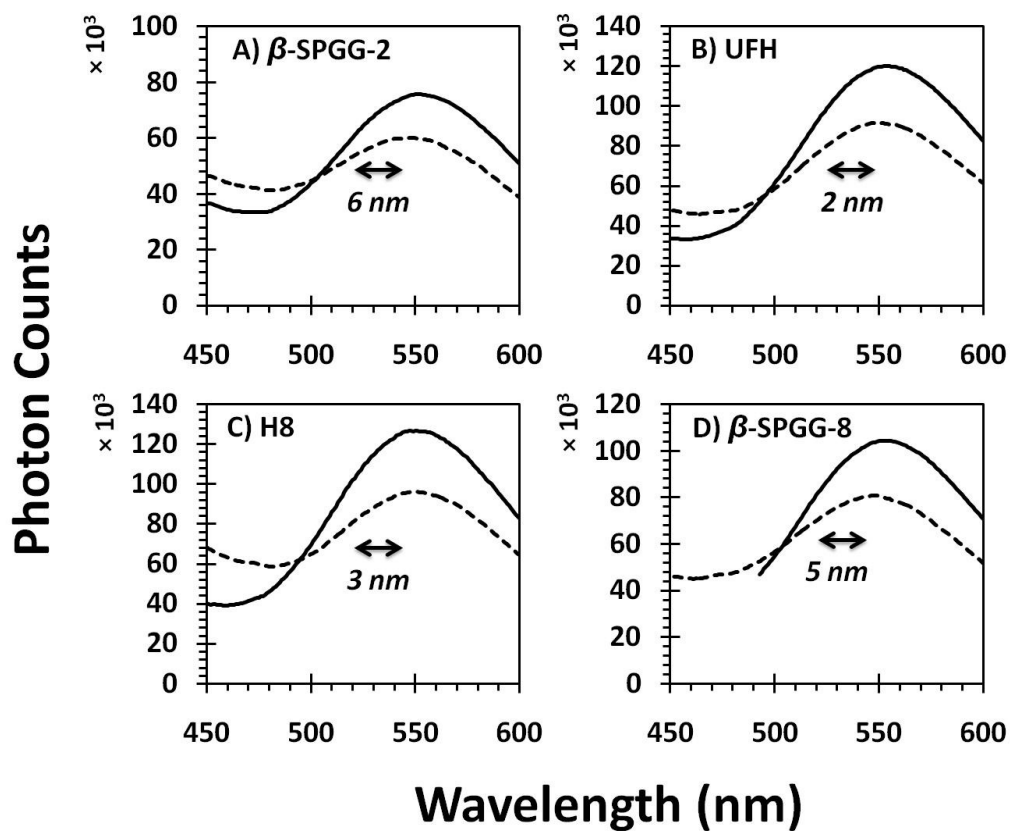

**Figure S3.** Changes in the fluorescence emission spectra of dansylated FXIa (FXIa-DEGR) ( $\lambda_{\text{EX}} = 345 \text{ nm}$ ) induced by the binding of  $\beta$ -SPGG-2 (A), UFH (B), H8 (C), and  $\beta$ -SPGG-8 (D). Solid lines represent the emission spectra of FXIa-DEGR in buffer. Dash lines represent the emission spectra of saturated complexes of FXIa-DEGR and corresponding ligands. Spectra were recorded in 50 mM TrisHCl buffer of pH 7.4 containing 150 mM NaCl and 0.1% PEG8000 at 37 °C.

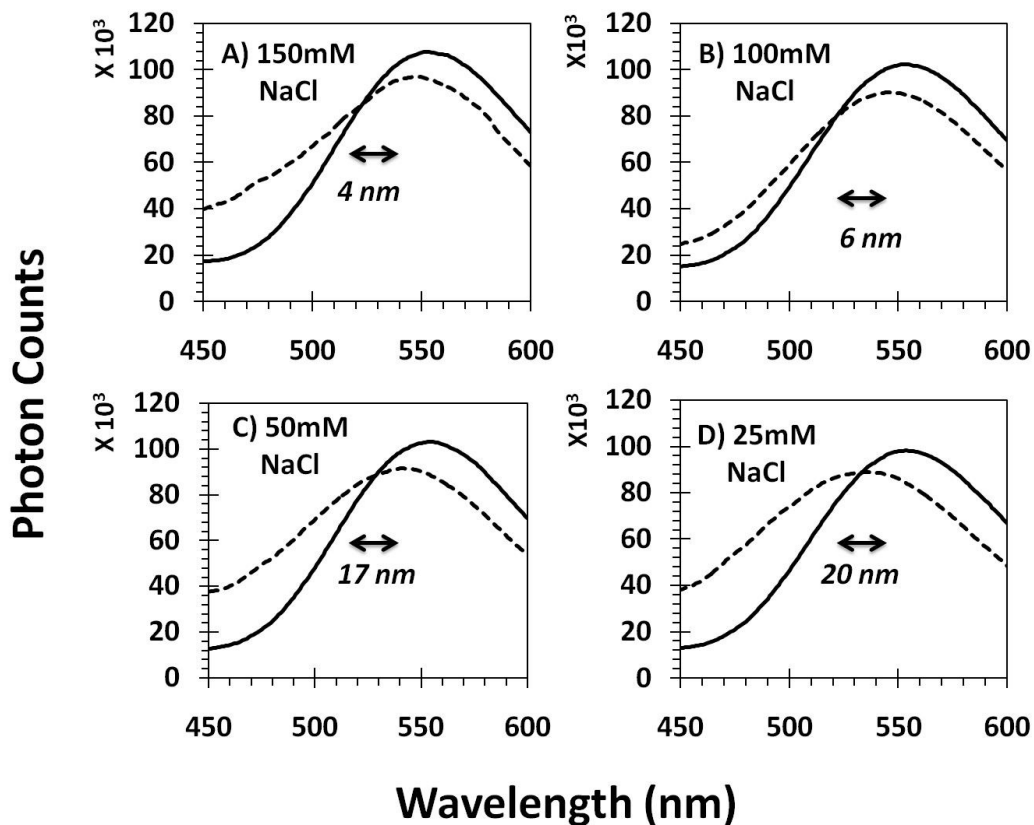

**Figure S4.** Changes in the fluorescence emission spectrum of dansylated factor XIa (FXIa-DEGR) ( $\lambda_{\text{EX}} = 345 \text{ nm}$ ) induced by the binding of  $\beta$ -SPGG-2 at different salt concentrations of 150 (A), 100 (B), 50 (C), and 25 mM (D). Solid lines represent the emission spectra of FXIa-DEGR in buffer. Dash lines represent the emission spectra of saturated complexes of FXIa-DEGR with  $\beta$ -SPGG-2. Spectra were recorded in 50 mM TrisHCl buffer of pH 7.4 containing 25–150 mM NaCl and 0.1% PEG8000 at 37 °C.

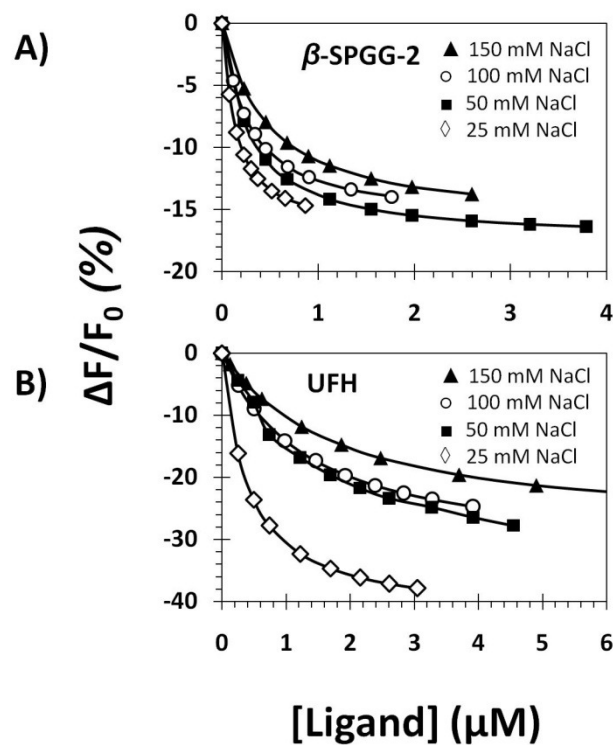

**Figure S5.** Spectrofluorimetric measurement of the FXIa–DEGR affinity of  $\beta$ -SPGG-2 (A) and UFH (B) at pH 7.4 and 37 °C and different salt concentrations of 150 (▲), 100 (○), 50 (■), and 25 mM (◇). The binding of  $\beta$ -SPGG-2 or UFH to FXIa–DEGR resulted in a saturable decrease in the dansyl group fluorescence at  $\sim 547$  nm ( $\lambda_{\text{EX}} = 345$  nm), which was fitted to the quadratic binding Eq. 2 to calculate the observed  $K_D$ . Solid lines represent the nonlinear regressional fit. Experiments were performed in 50 mM TrisHCl buffer of pH 7.4 containing 150 mM NaCl and 0.1% PEG8000. See Experimental procedures for details.
